# Supplementary material
Source: publisher site journal article supplement (http://static.cambridge.org/content/id/urn:cambridge.org:id:article:S0032247418000645/resource/name/S0032247418000645supp001.docx)
Supplement: Supplementary file 1 [file S0032247418000645supp001.docx]

# Supporting material


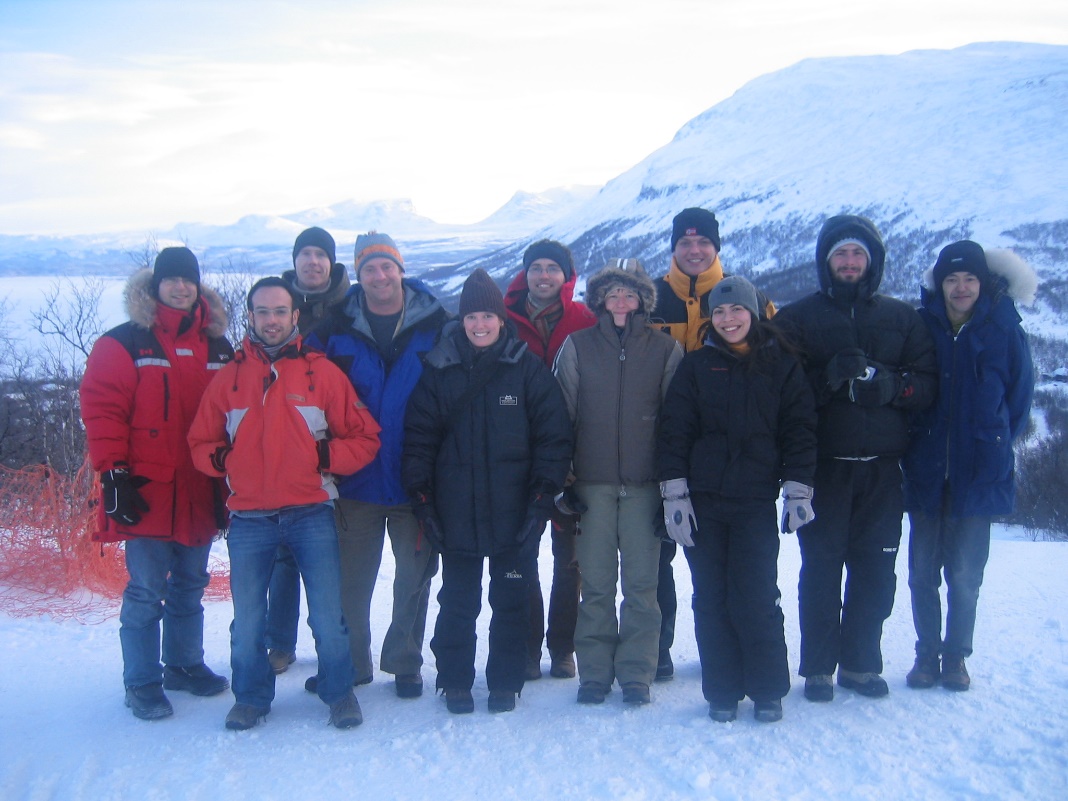


**Figure S1.** The national representatives that participated at the Permafrost Young Researchers Network Kick-off meeting in Abisko, Sweden from 22-24 February 2007. From left to right: Tim Haltigin (Canada), Hugues Lantuit (Germany), Håvard Juliussen (Norway), Andrew Balser (USA), Margareta Johansson (Sweden), Etienne Cossart (France), Cecile Menard (UK), Michael Avian (Austria), Raquel Melo (Portugal), Pablo Wainstein (Canada), and Tetsuo Sueyoshi (Japan).

**
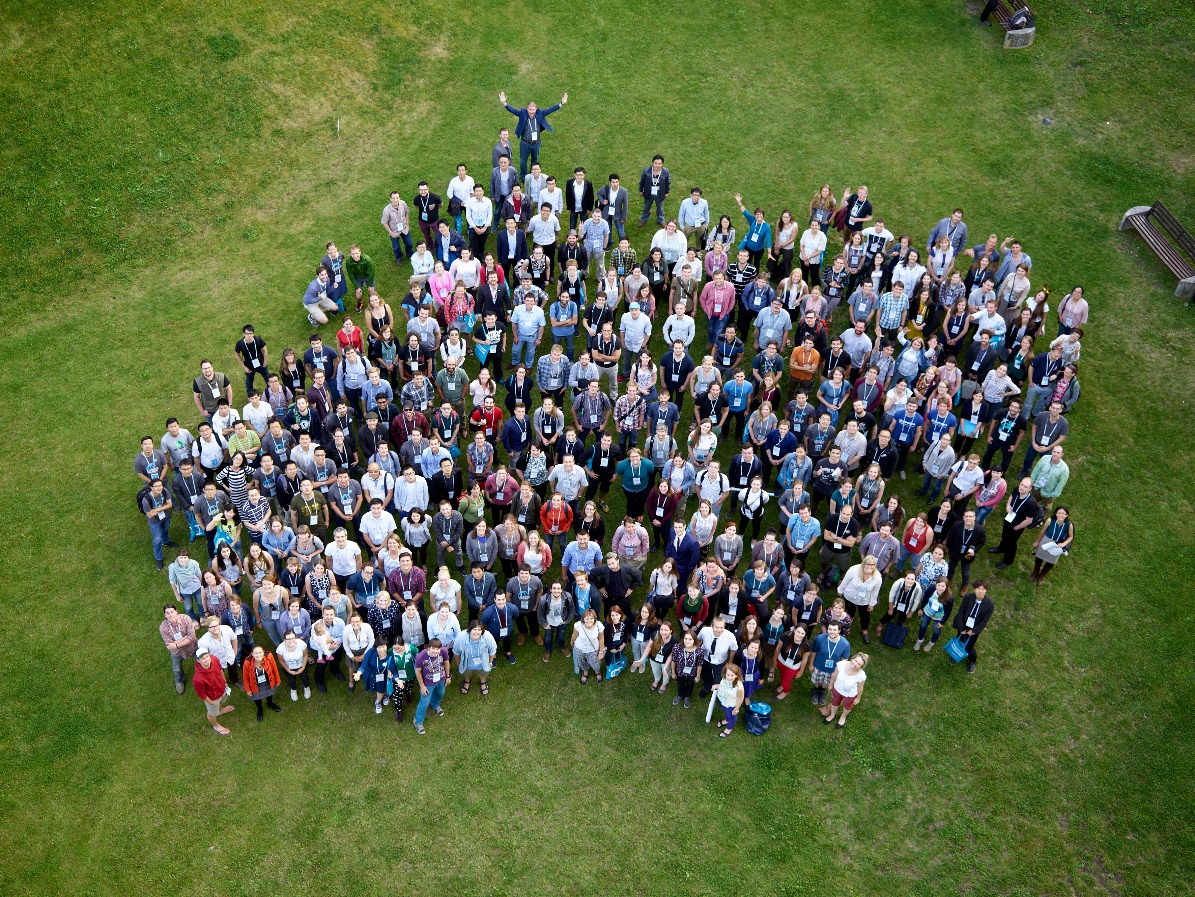
**

**Figure S2.** Largest recent PYRN gathering with approximately 280 people at the 11th International Conference on Permafrost (ICOP 2016) in Potsdam, Germany from 22-24 June 2016 (photo credit: Jan Pauls).


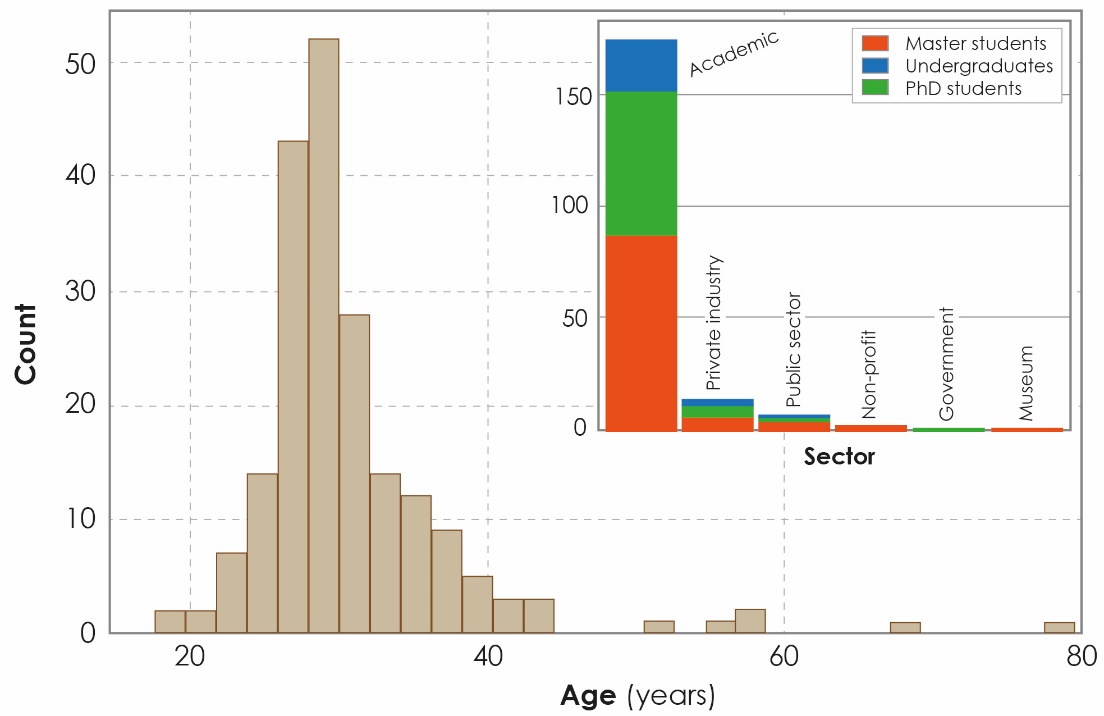


**Figure S3.** Bar chart showing the distribution of PYRN members by age, and stacked bar-chart showing the distribution of PYRN members by work sector and highest degree completed (*n* = 200). The charts only show PYRN members that participated in the online survey.


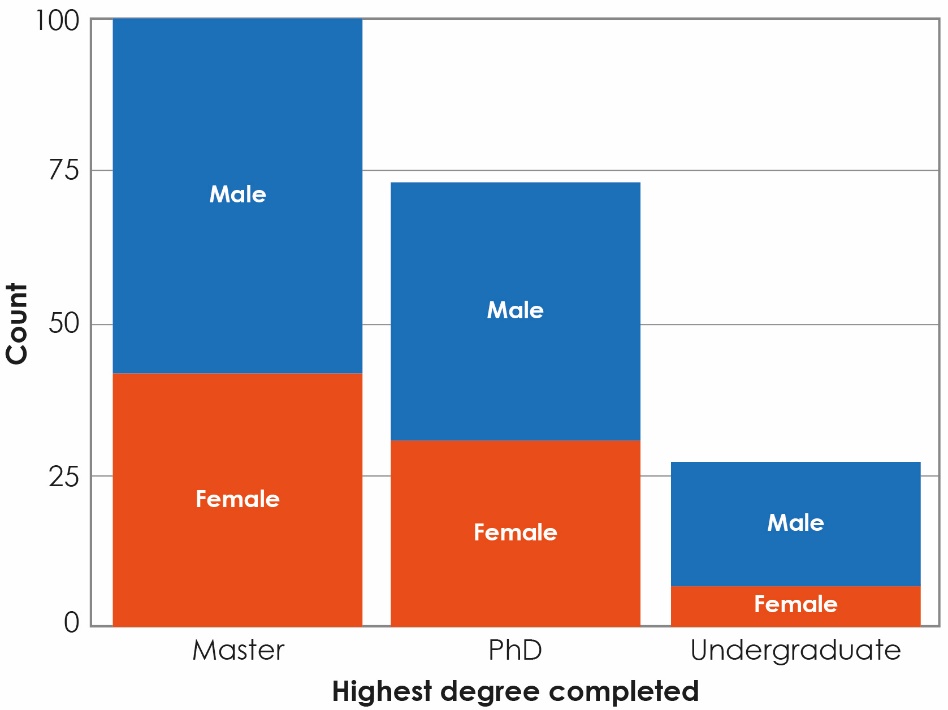


**Figure S4.** Stacked bar-chart showing the distribution of PYRN members by gender and highest degree completed (*n* = 200). The chart only shows PYRN members that participated in the online survey.


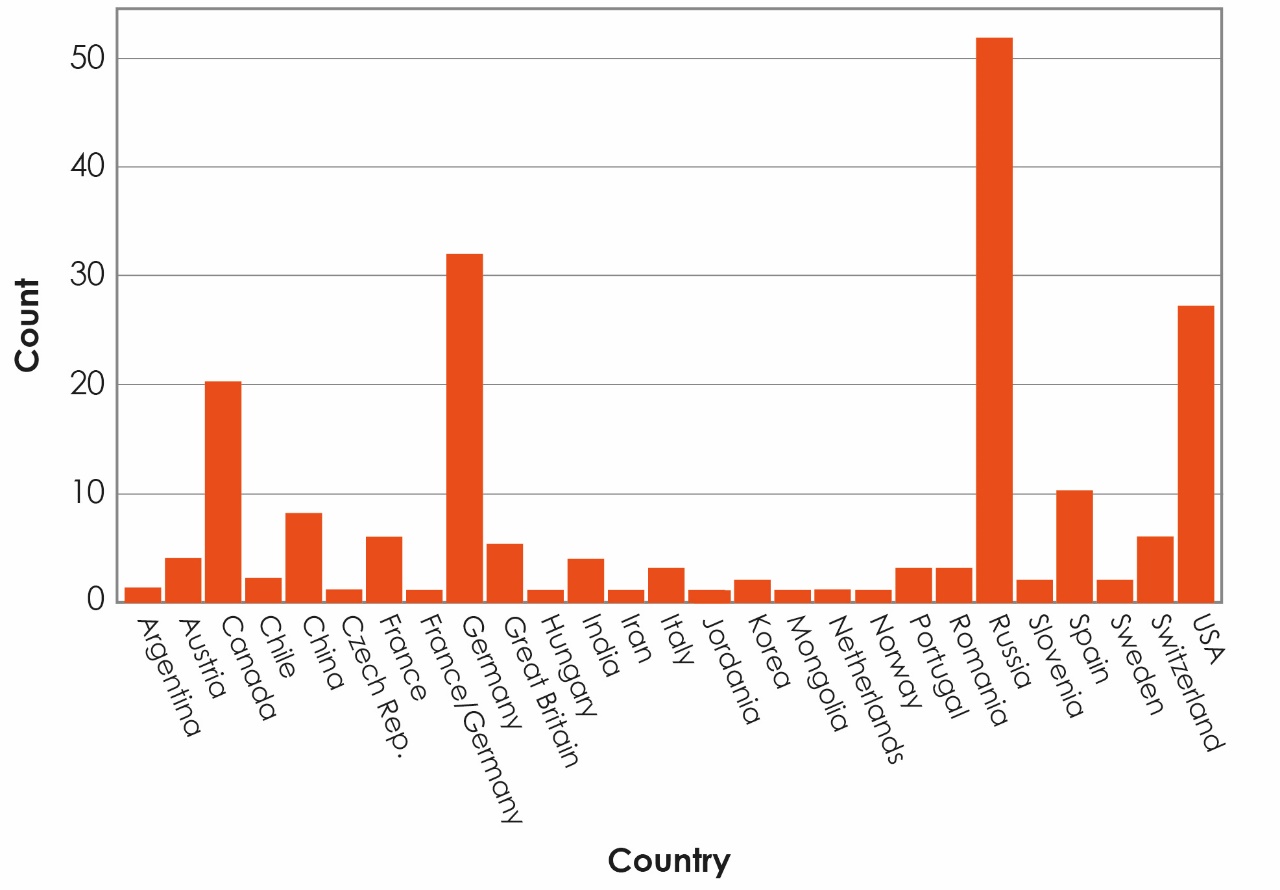


**Figure S5.** Bar-chart showing the distribution of PYRN members by country (*n* = 200).
The chart only shows PYRN members that participated in the online survey.

**Table S1.** Summary of the major activities and events that PYRN co-organized since 2005; see note below the table for list of co-organizing or supporting partners and Table S3 for the definition of abbreviation.

| **Activity / Event** | **Date and Year** |
| --- | --- |
| Establishment of PYRN at ICARP II in Copenhagen, Denmark | 10-12 November 2005 |
| First PYRN awards at the 1st ACOP in Lanzhou, China | 7-16 August 2006 |
| PYRN Kick-off meeting in Abisko, Sweden | 22-24 February 2007 |
| OSL-APECS-PYRN workshop in St. Petersburg, Russia | 29 November - 2 December 2007 |
| Launch of PYRN-TSP project | 2007 and following years |
| PYRN awards and side events at NICOP 2008 in Fairbanks, Alaska | 28 June-3 July 2008 |
| USPA-PYRN awards at AGU 2008 in San Francisco, USA | 15-19 December 2008 |
| PYRN social event at EGU 2009 in Vienna, Austria | 19-24 April 2009 |
| USPA-PYRN awards and forum at AGU 2009 in San Francisco, USA | 14-18 December 2009 |
| APECS-PYRN workshop at AGU 2010 in San Francisco, USA | 13-17 December 2010 |
| PYRN workshop and awards at TICOP in Salekhard, Russia | 25-29 June 2012 |
| IPA-PYRN TICOP summer school, Polar Ural Mountains, Russia | June / July 2012 |
| PYRN awards at the IV Iberian conference of IPA in Vall de Núria, Spain | 25-27 July 2013 |
| Third forum for young permafrost scientists in Yakutsk, Russia | 24-27 June 2013 |
| PYRN-APECS workshops at EGU 2014 in Vienna, Austria | 27 April - 2 May 2014 |
| PYRN workshop, awards, and side events at EUCOP4 in Évora, Portugal | 18-21 June 2014 |
| PYRN-APECS-ASA social events at Arctic Change in Ottawa, Canada | 8-12 December 2014 |
| PYRN workshop / course at EGU 2015 in Vienna, Austria | 12-17 April 2015 |
| APECS-PYRN panel discussion at the IGU 2015 in Moscow, Russia | 17-21 August 2015 |
| PYRN awards at GeoQuébec 2015 in Québec City, Canada | 20-23 September 2015 |
| ASA-PYRN events at ArcticNet 2015 in Vancouver, Canada | 7-11 December 2015 |
| USPA-PYRN social event at AGU 2015 in San Francisco, USA | 14-18 December 2015 |
| **Note.** Events and meetings were co-organized or supported by the following partners: IPA, ASA, USPA, PEI, CliC, IASC, GTN-P, Russian Academy of Sciences, Permafrost working group of the *Deutsche Gesellschaft für Polarforschung*, the Bolin Centre for Climate Reseasrch, and various large research projects such as Nunataryuk, PAGE21, and ADAPT. | |

**Table S1 (continued).**

| **Activity / Event** | **Date and Year** |
| --- | --- |
| PYRN workshop and awards at ICOP 2016 in Potsdam, Germany | 20-24 June 2016 |
| PYRN Russia Workshop on Yamal Crater Studies in Moscow, Russia | 16 December 2016 |
| PYRN D-A-CH at the 9th permafrost meeting in Einsiedeln, Switzerland | 9-11 February 2017 |
| PYRN workshop / course and social event at EGU 2017 in Vienna, Austria | 8-13 April 2017 |
| Students in Polar and Alpine Research Conference 2017 in Brno, Czech Rep. | 20-22 April 2017 |
| PYRN event at Earth's Cryosphere Conference in Pushchino, Russia | 4-8 June 2017 |
| PYRN workshop at VI *Congreso Ibérico de la International* in Mieres, Spain | 21-23 June 2017 |
| PYRN awards and social events at ACOP 2017 in Sapporo, Japan | 2-6 July 2017 |
| PYRN Discussion Panel at AGU 2017 in New Orleans, USA | 11-15 December 2017 |
| PYRN Discussion Panel at OCSNRS 2018 in Sherbrooke, Canada | 15 February 2018 |
| PYRN Discussion Panel at CEN Colloque 2018 in Sherbrooke, Canada | 15-16 February 2018 |
| PYRN workshop, awards, and side events at EUCOP5 in Chamonix, France | 23 June - 1 July 2018 |

**Table S2.** Summary of answers from the PYRN membership survey in 2015. Answers (*n* = 200) refer to mean index values ranging from 1 to 5 with 1 being more and 5 being less important.

| **Question** (How important is/are…?) | **Answer** |
| --- | --- |
| Information about conferences and meetings | 2.4 |
| Offering workshops | 2.6 |
| Information about funding | 2.7 |
| Job postings | 2.7 |
| Pointing out funding opportunities | 2.7 |
| Advertising conferences and meetings | 2.8 |
| News about permafrost-related issues | 2.8 |
| Exchange with young researchers | 2.9 |
| Offering social events | 3.0 |
| More information and news | 3.1 |
| More education and outreach | 3.2 |
| Access to literature, pictures, and videos | 3.3 |
| Activities in social media; YouTube, Twitter | 3.6 |

**Table S3.** List of abbreviations and definition.

| **Abbreviation** | **Definition** |
| --- | --- |
| ACOP | Asian Conference on Permafrost |
| ADAPT | Arctic Development and Adaptation to Permafrost in Transition |
| AGU | American Geophysical Union |
| APECS | Association of Polar Early Career Scientists |
| ASA | ArcticNet Student Association |
| CliC | Climate and Cryosphere |
| CNS | Centre d'excellence en Neurosciences de l'Université de Sherbrooke |
| EGU | European Geosciences Union |
| EUCOP4 | 4th European Conference on Permafrost |
| EUCOP5 | 5th European Conference on Permafrost |
| GTN-P | Global Terrestrial Network on Permafrost |
| IASC | International Arctic Science Committee |
| ICARP | International Conference on Arctic Research Planning |
| ICOP | International Conference on Permafrost |
| IPA | International Permafrost Association |
| IPY | International Polar Year |
| NICOP | Ninth International Conference on Permafrost |
| OCSNRS | Ottawa-Carleton Student Northern Research Symposium |
| OSL | Otto Schmidt Laboratory for Polar and Marine Research |
| PAGE21 | Changing Permafrost in the Arctic and its Global Effects in the 21st Century |
| PEI | Polar Educators International |
| PYRN | Permafrost Young Researchers Network |
| TICOP | Tenth International Conference on Permafrost |
| TSP | Thermal State of Permafrost |
| USPA | United States Permafrost Association |
